# Supplementary material for: Domestication of cattle: Two or three events?
Source: PubMed Central journal article supplement (PMC6304694; doi:10.1111/eva.12674), 2018-07-23

Scenario 2.

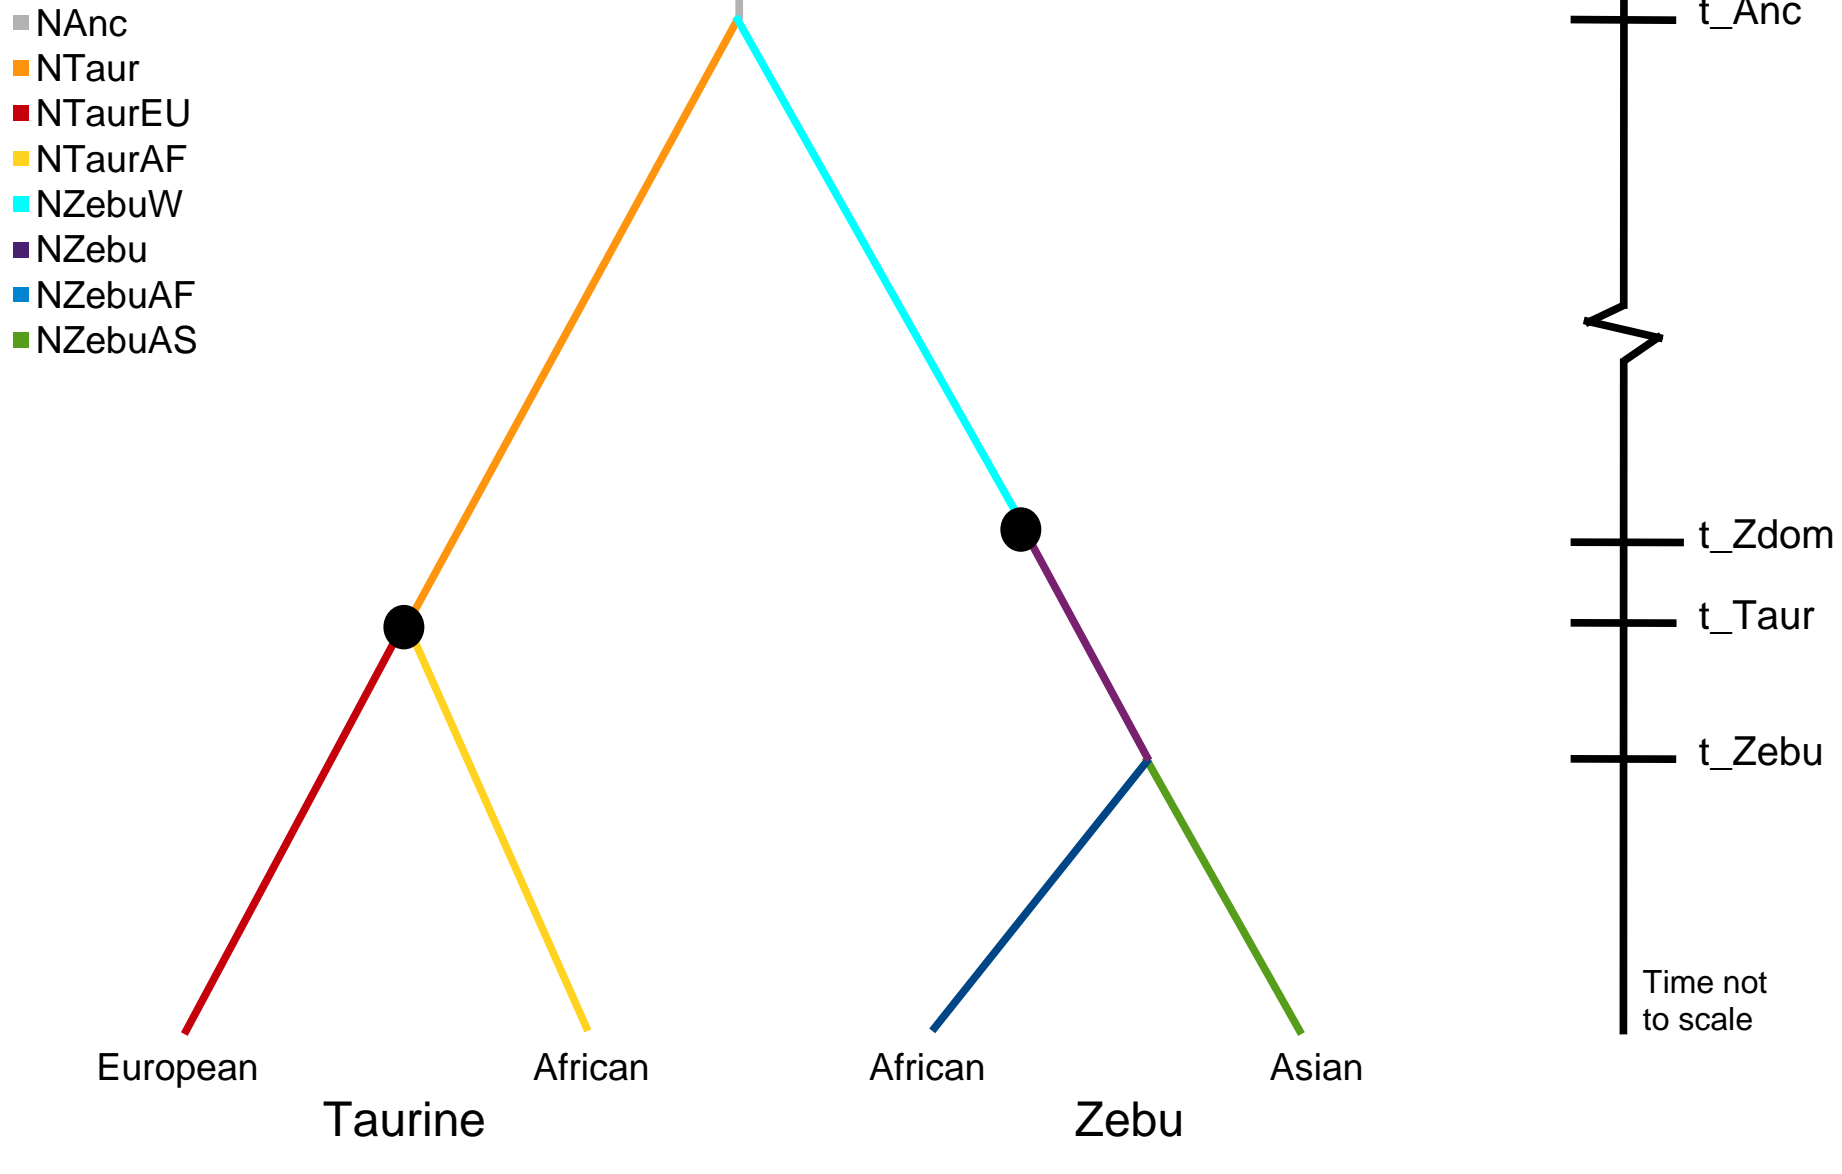

Scenario 3.

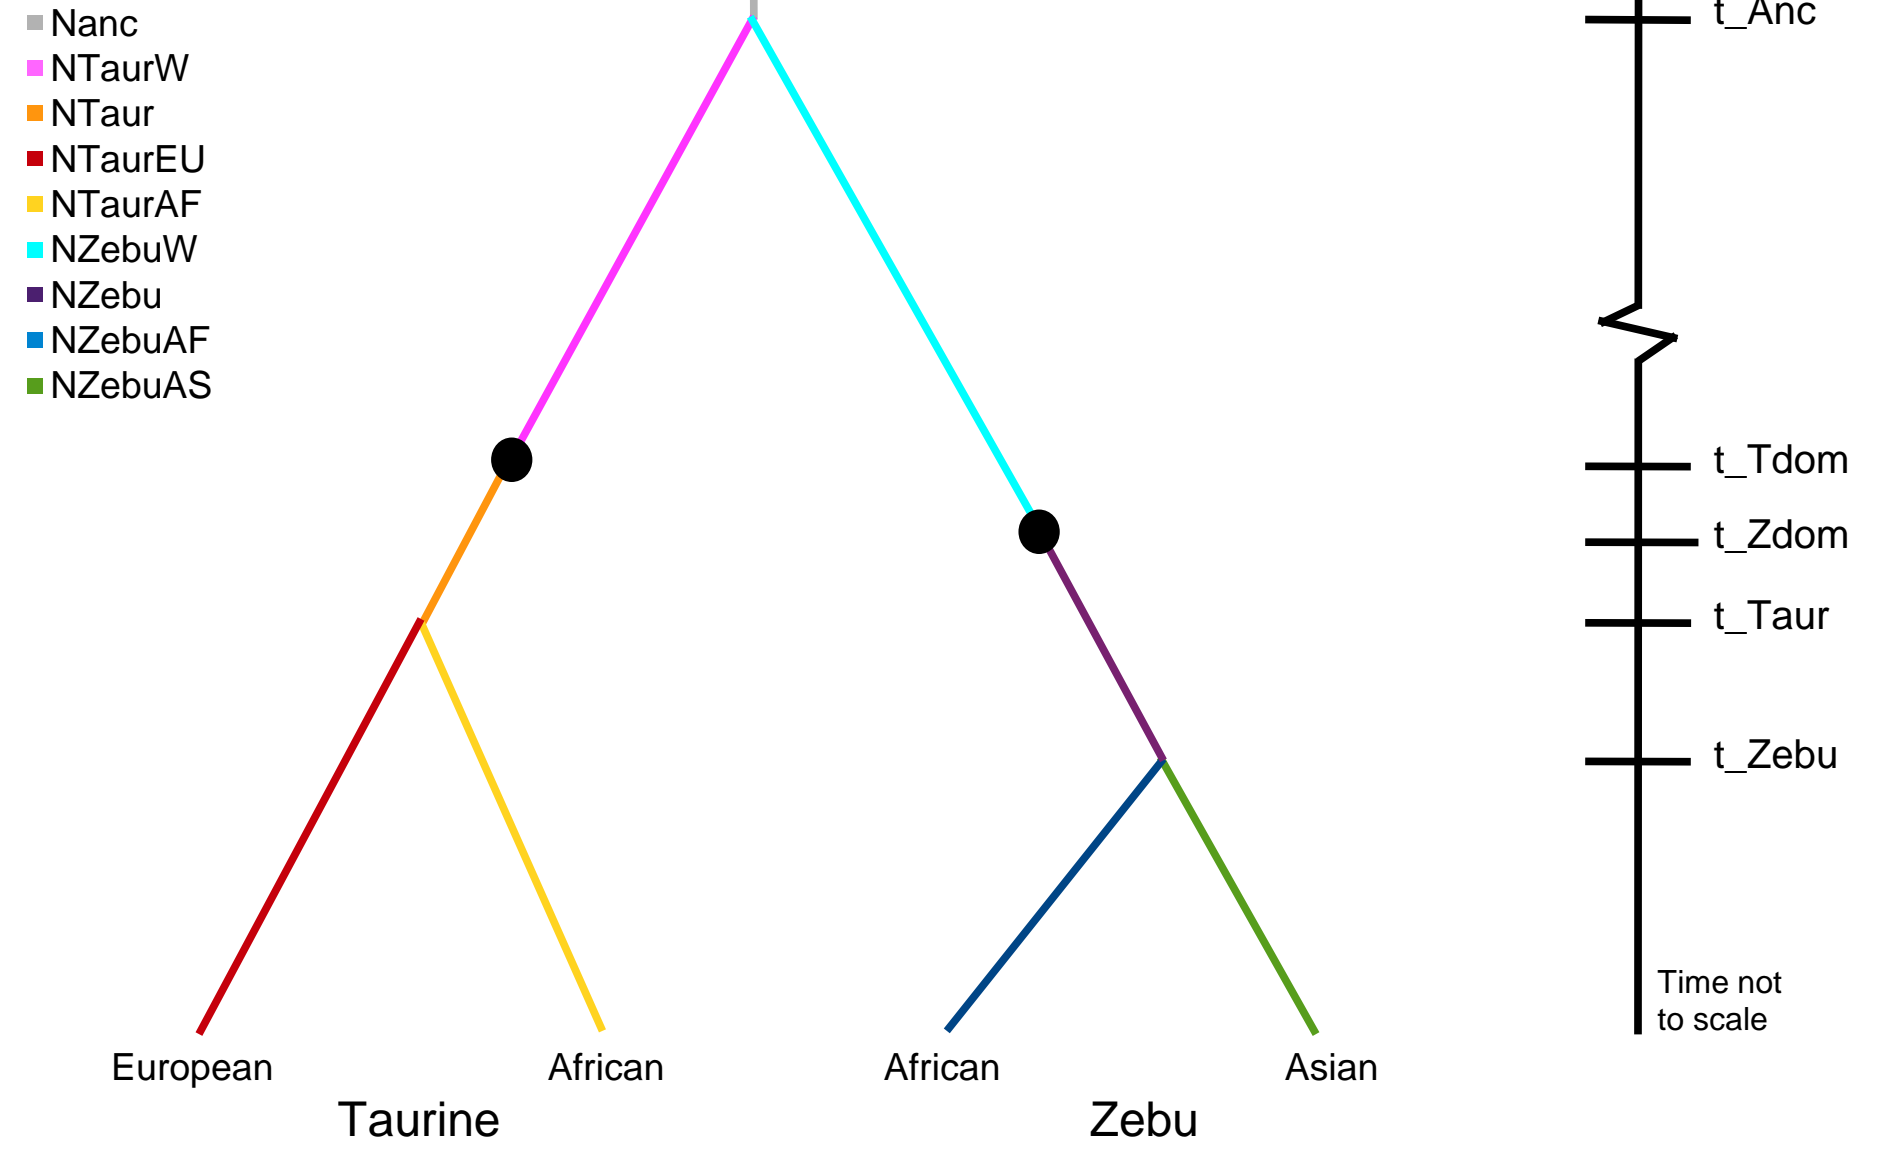

Scenario 5.

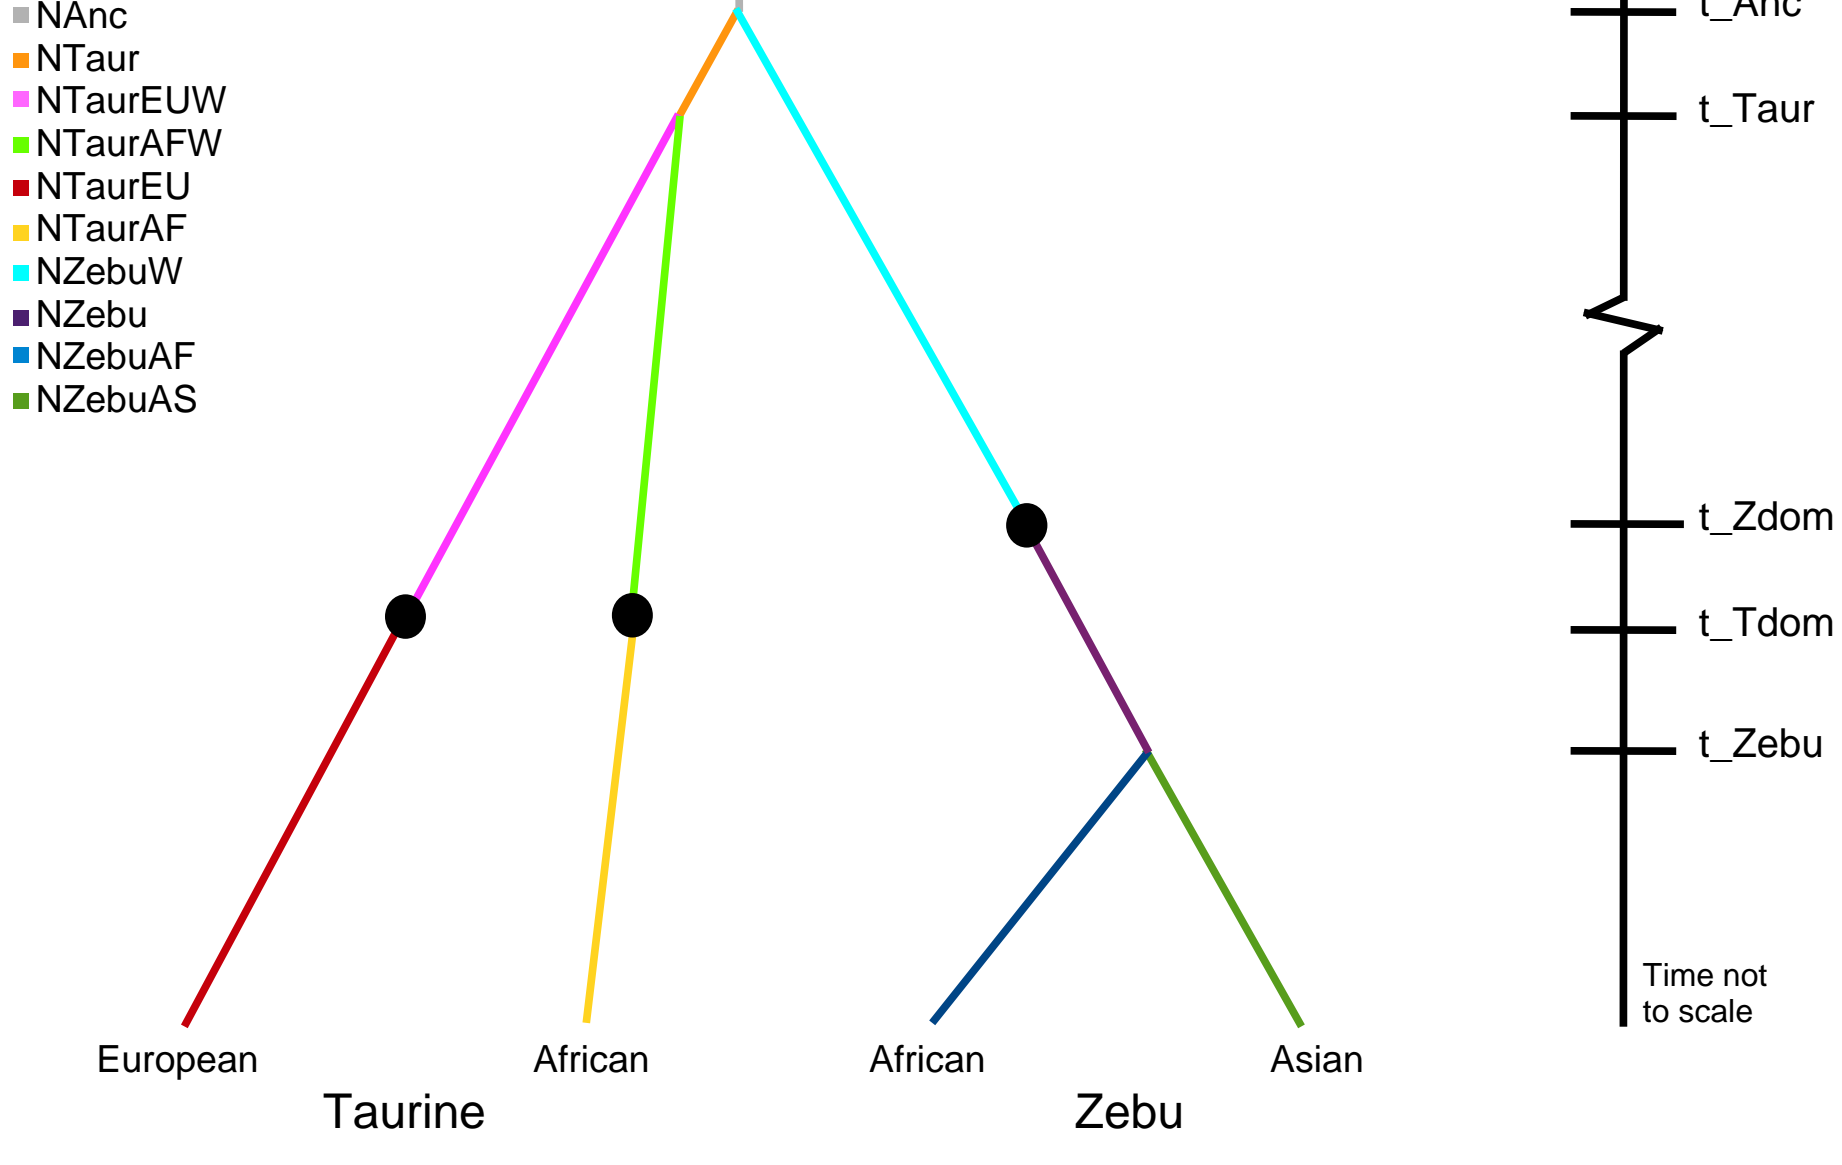

Scenario 6.

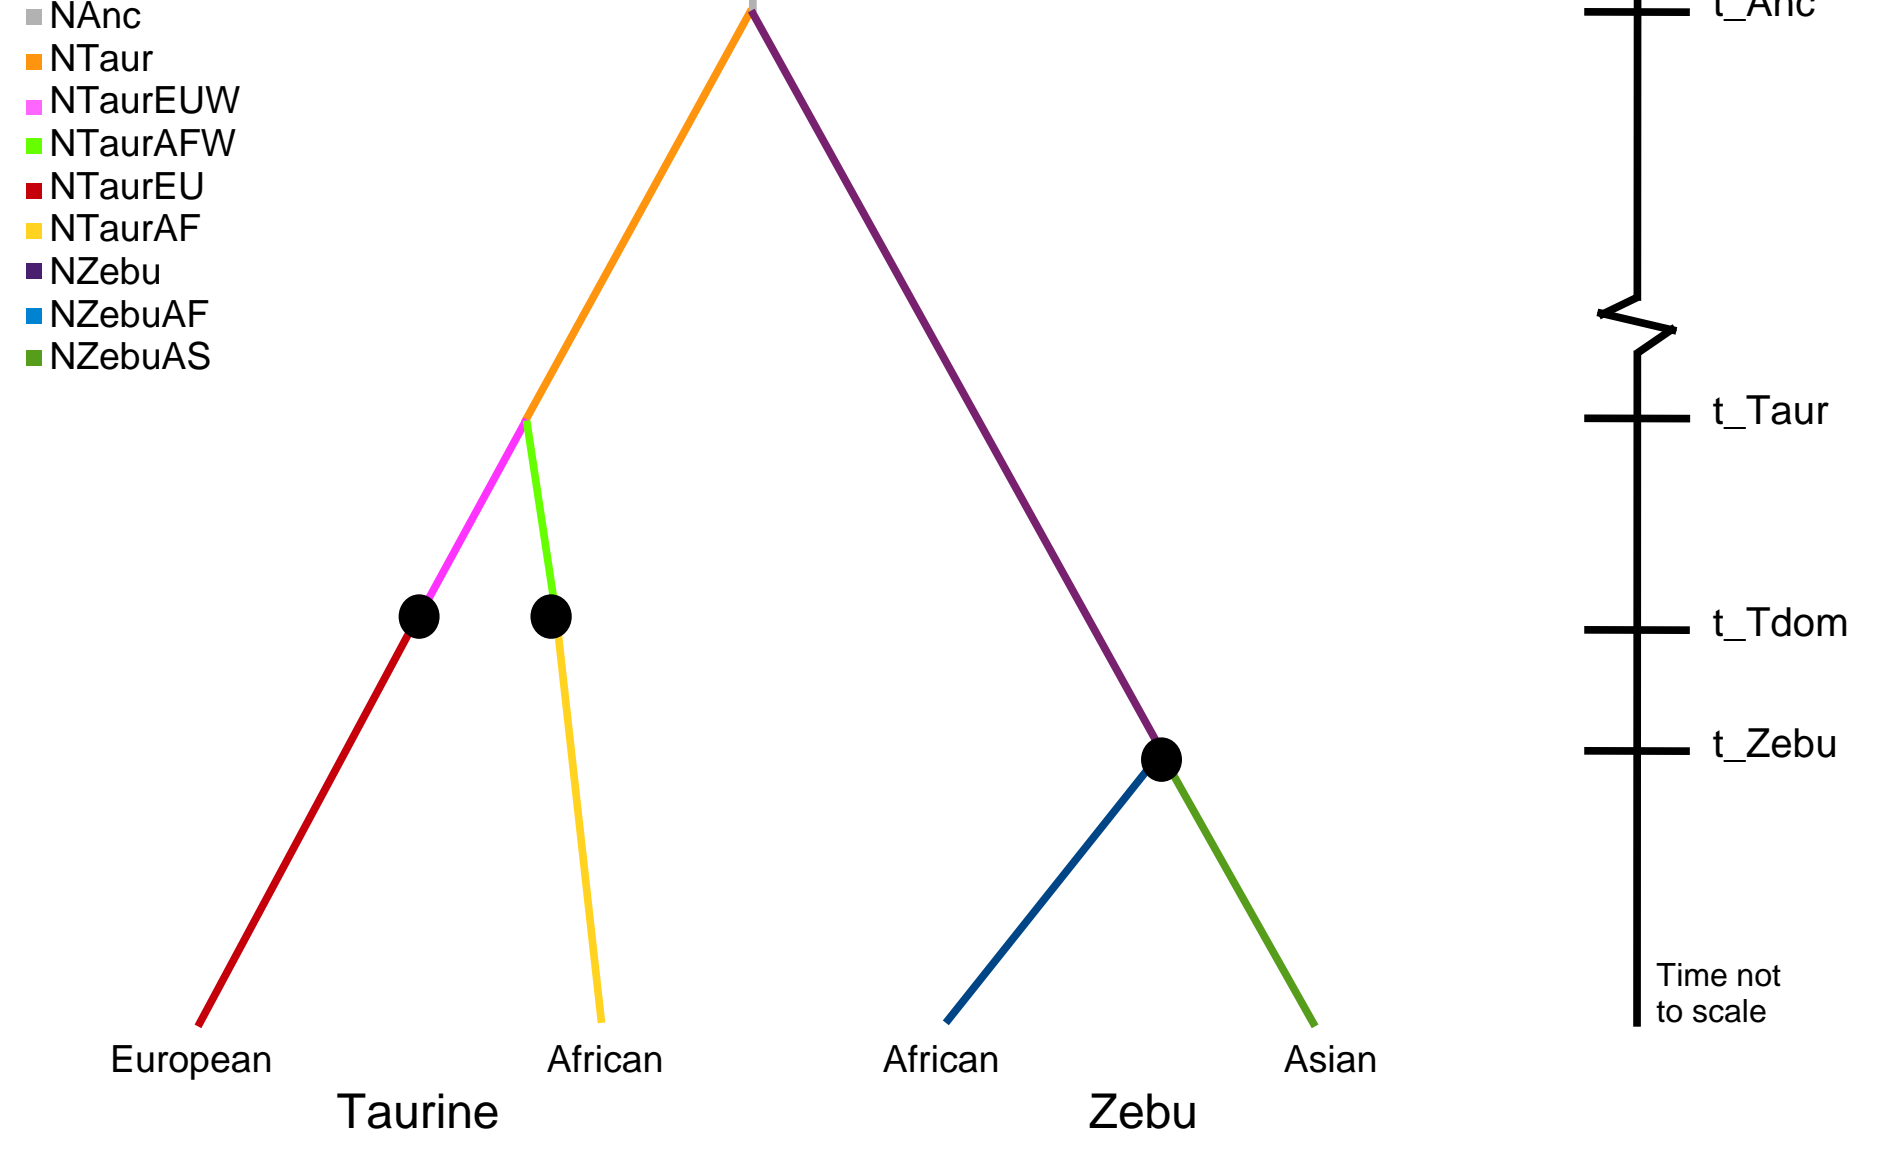

Scenario 7.

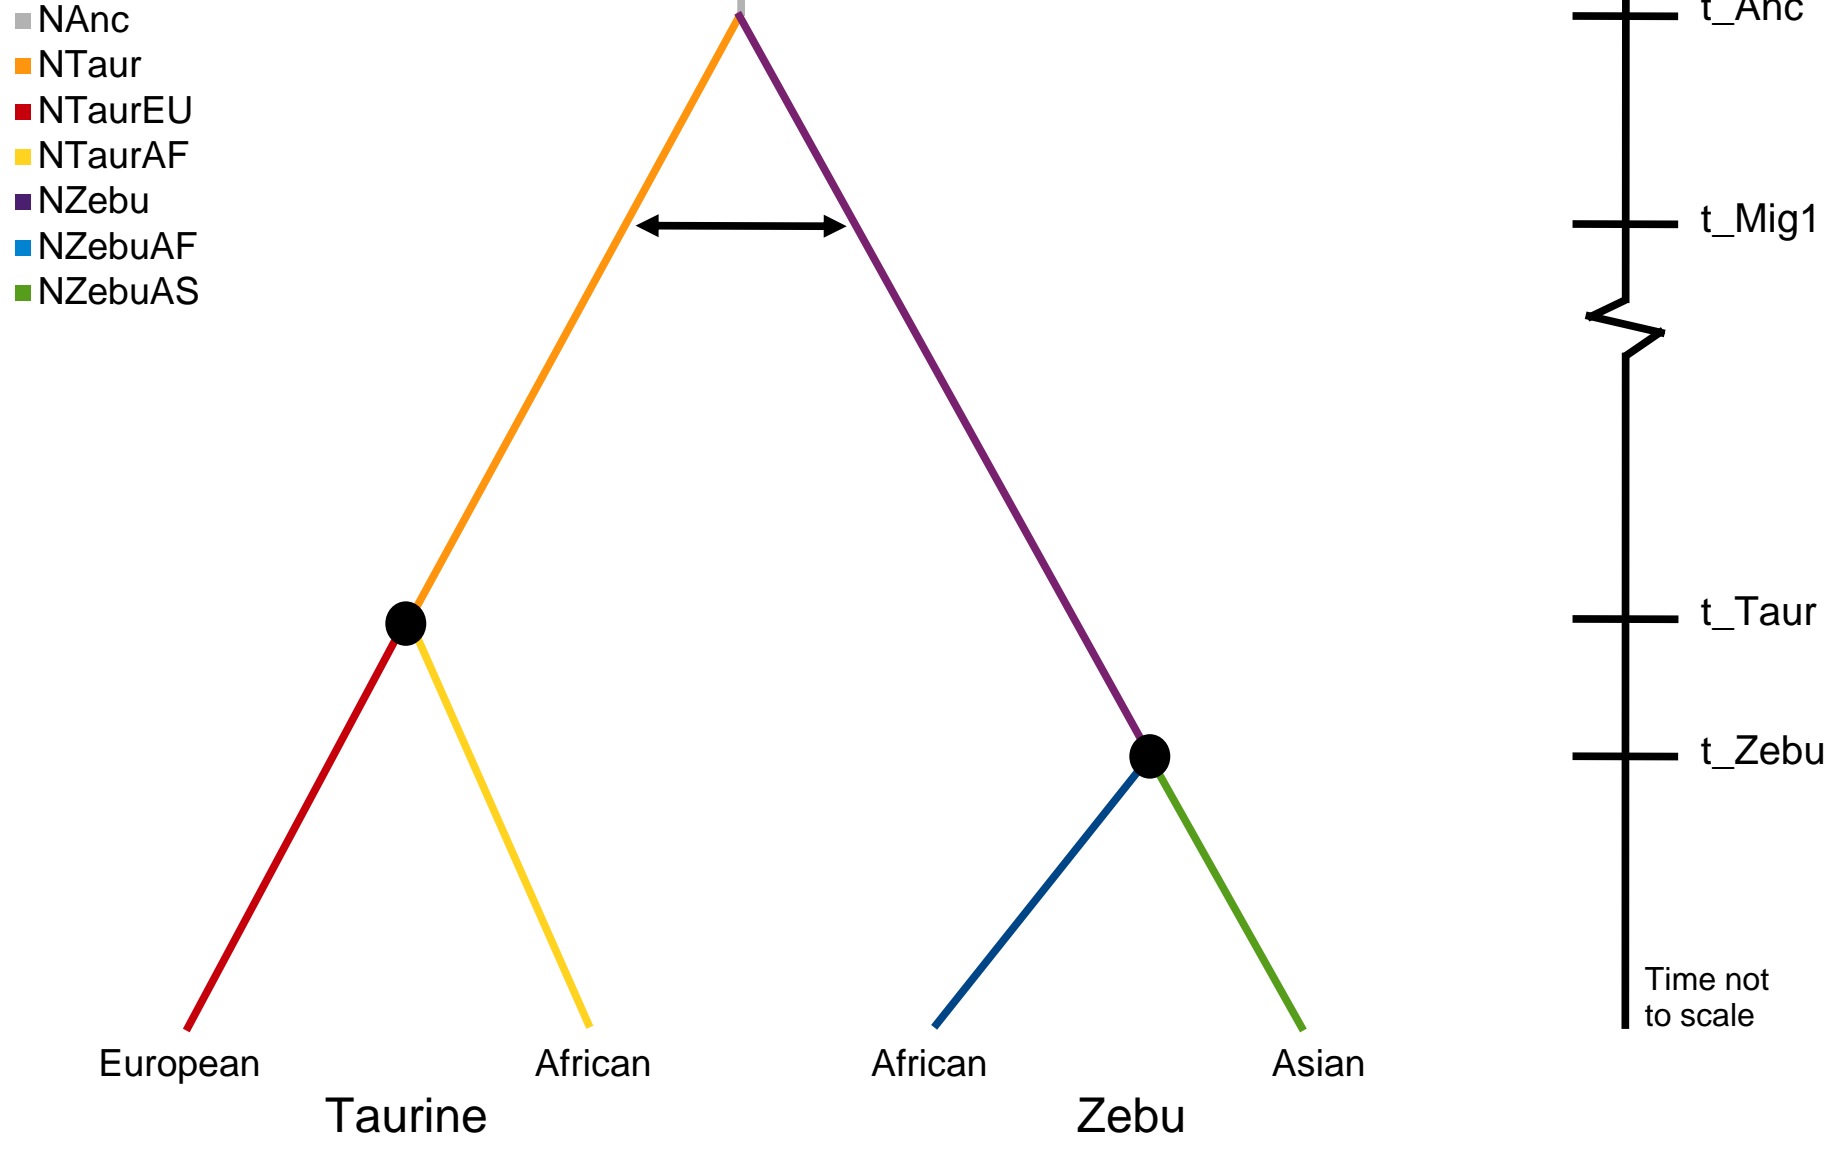

Scenario 9.

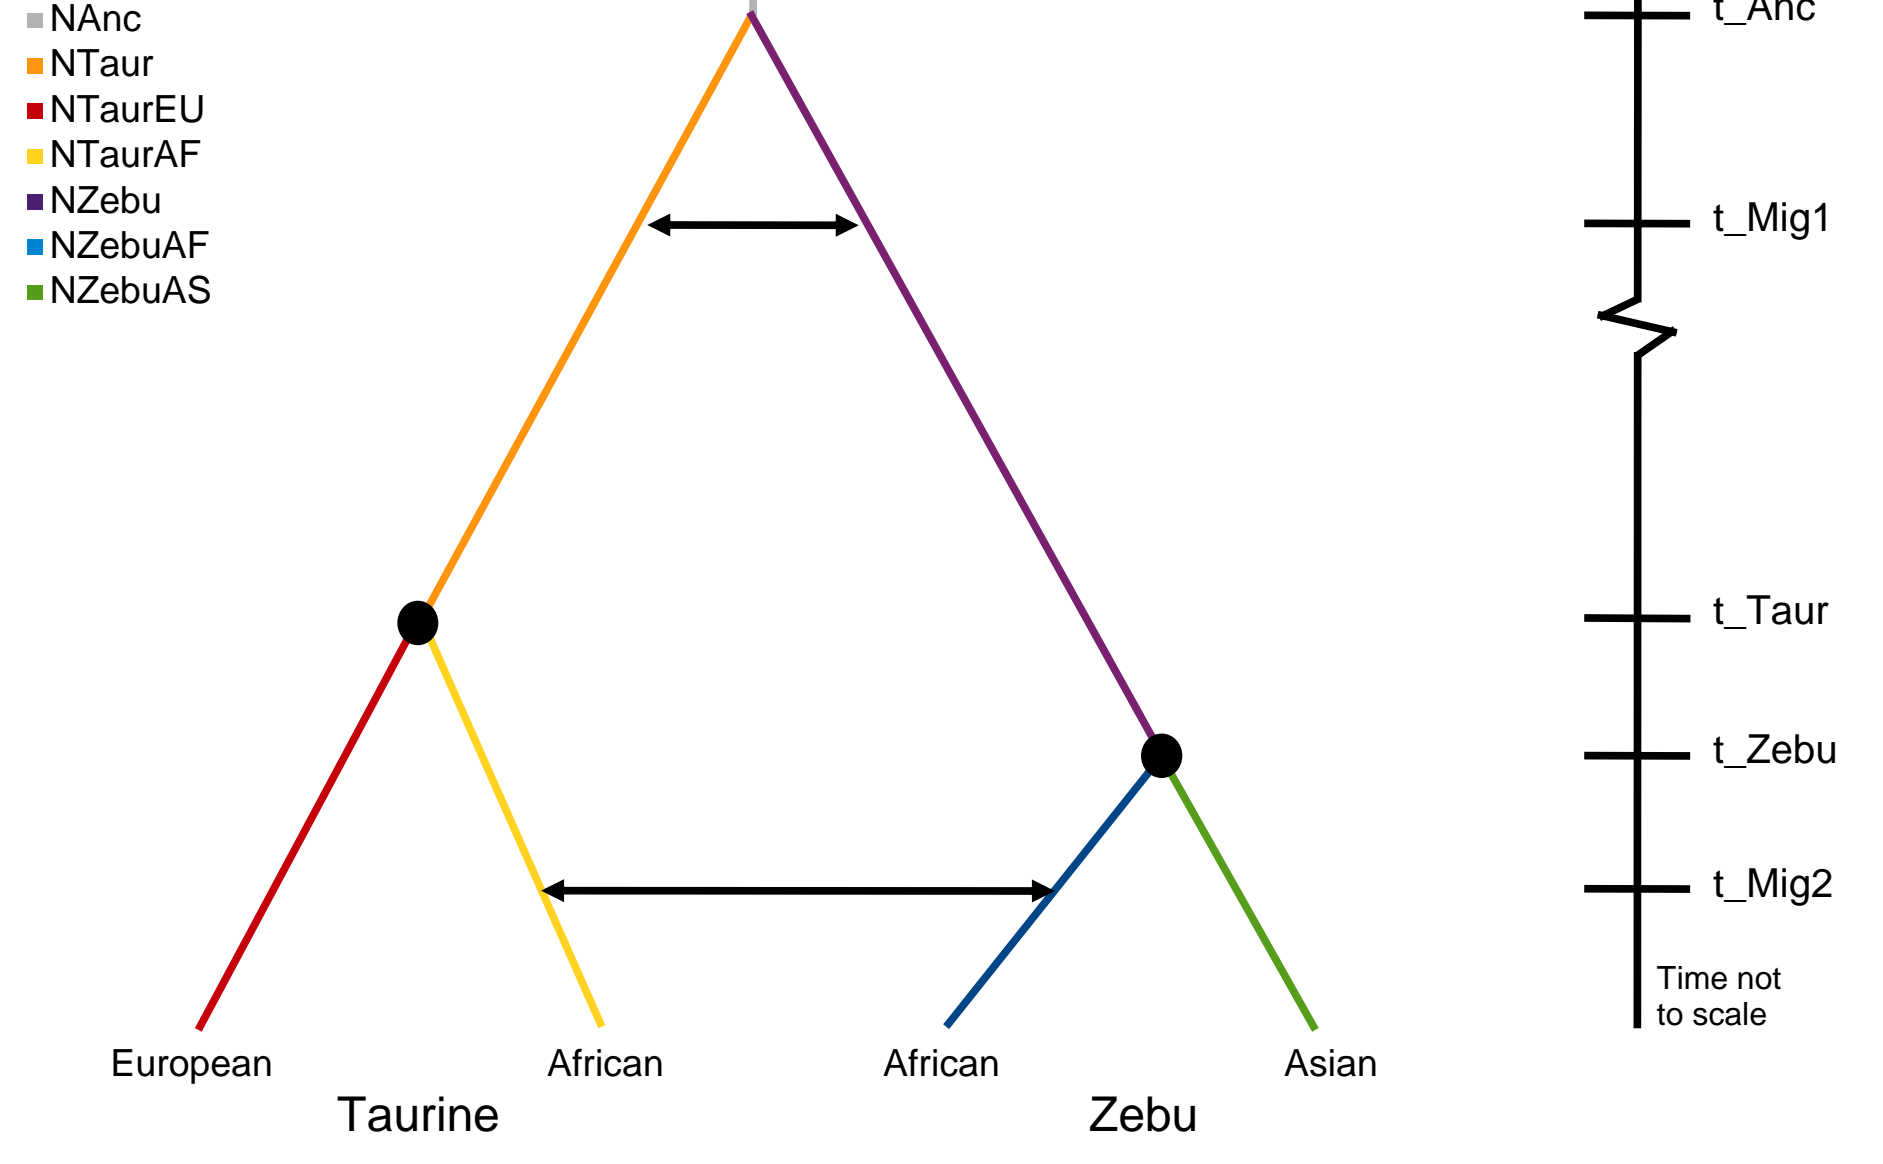

Scenario 10.

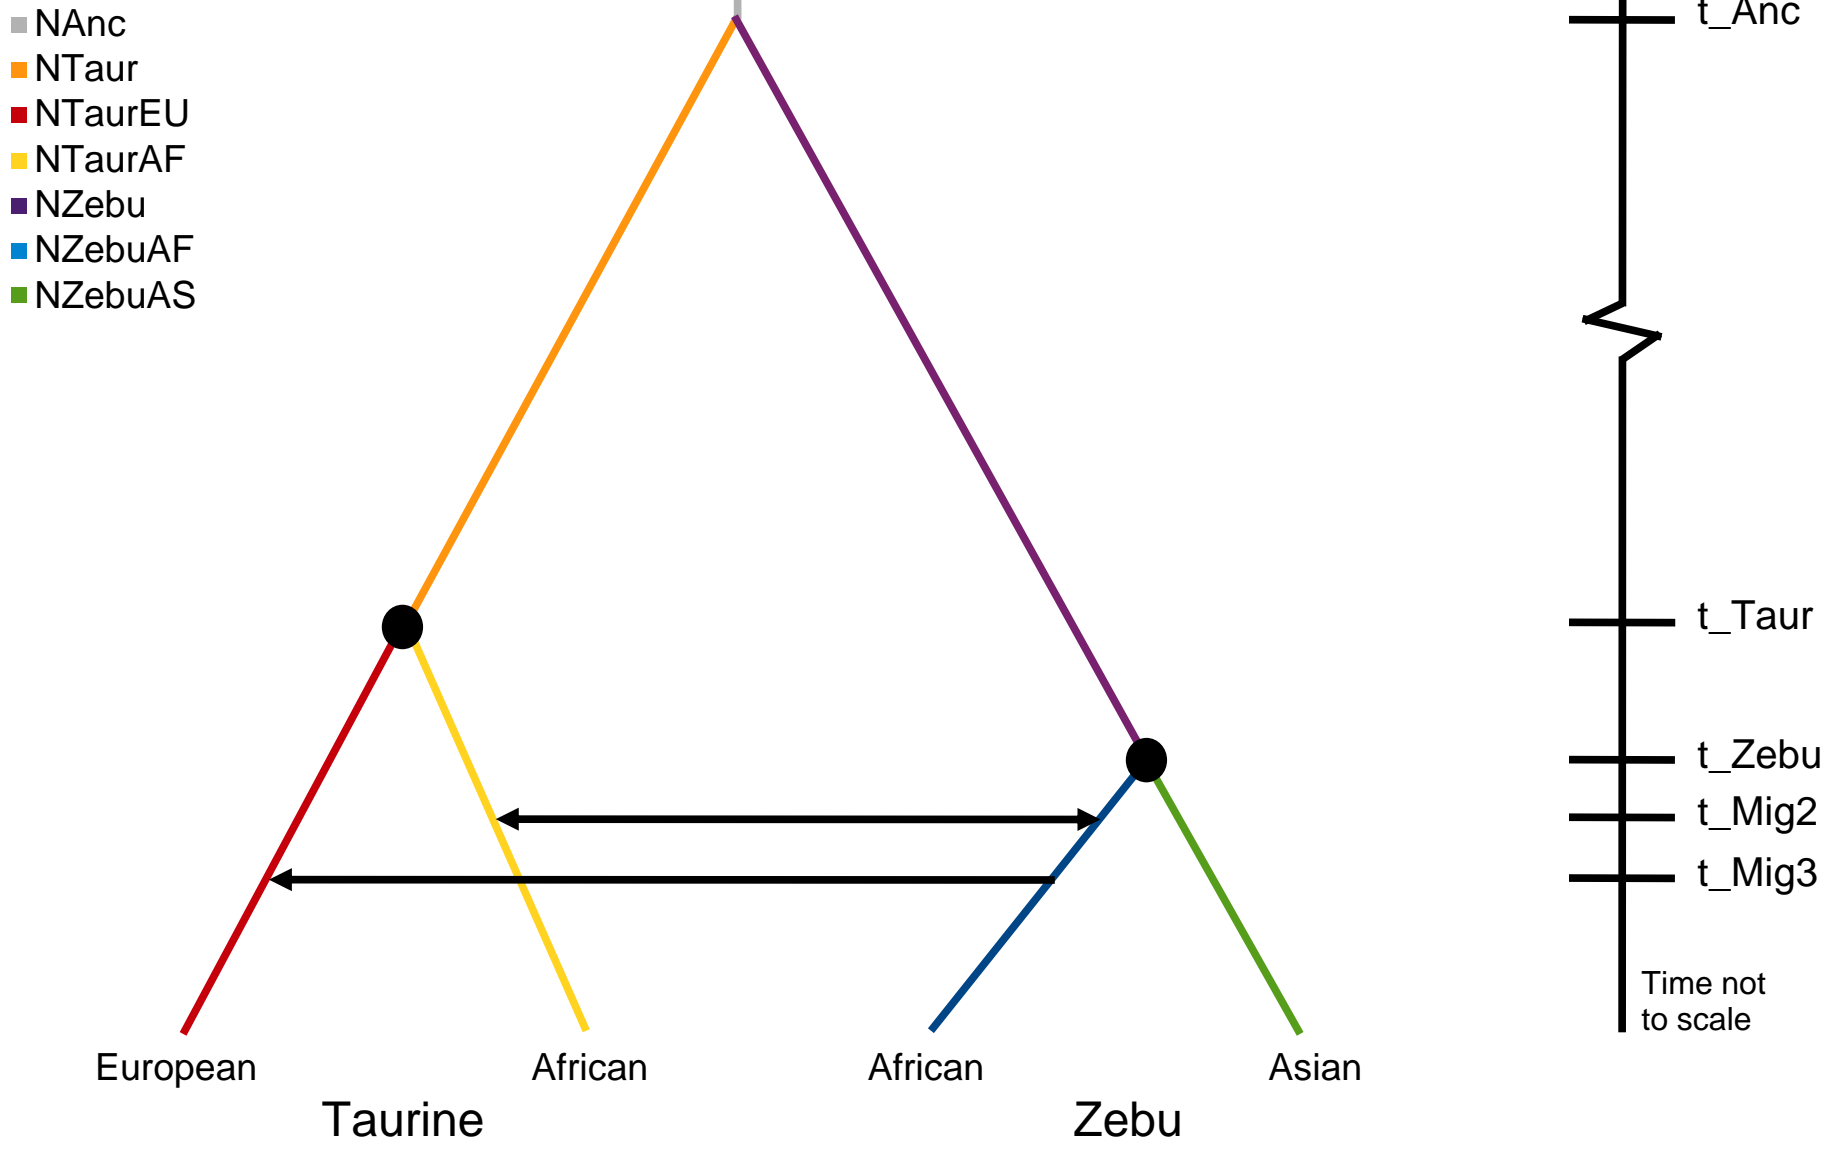

Scenario 12.

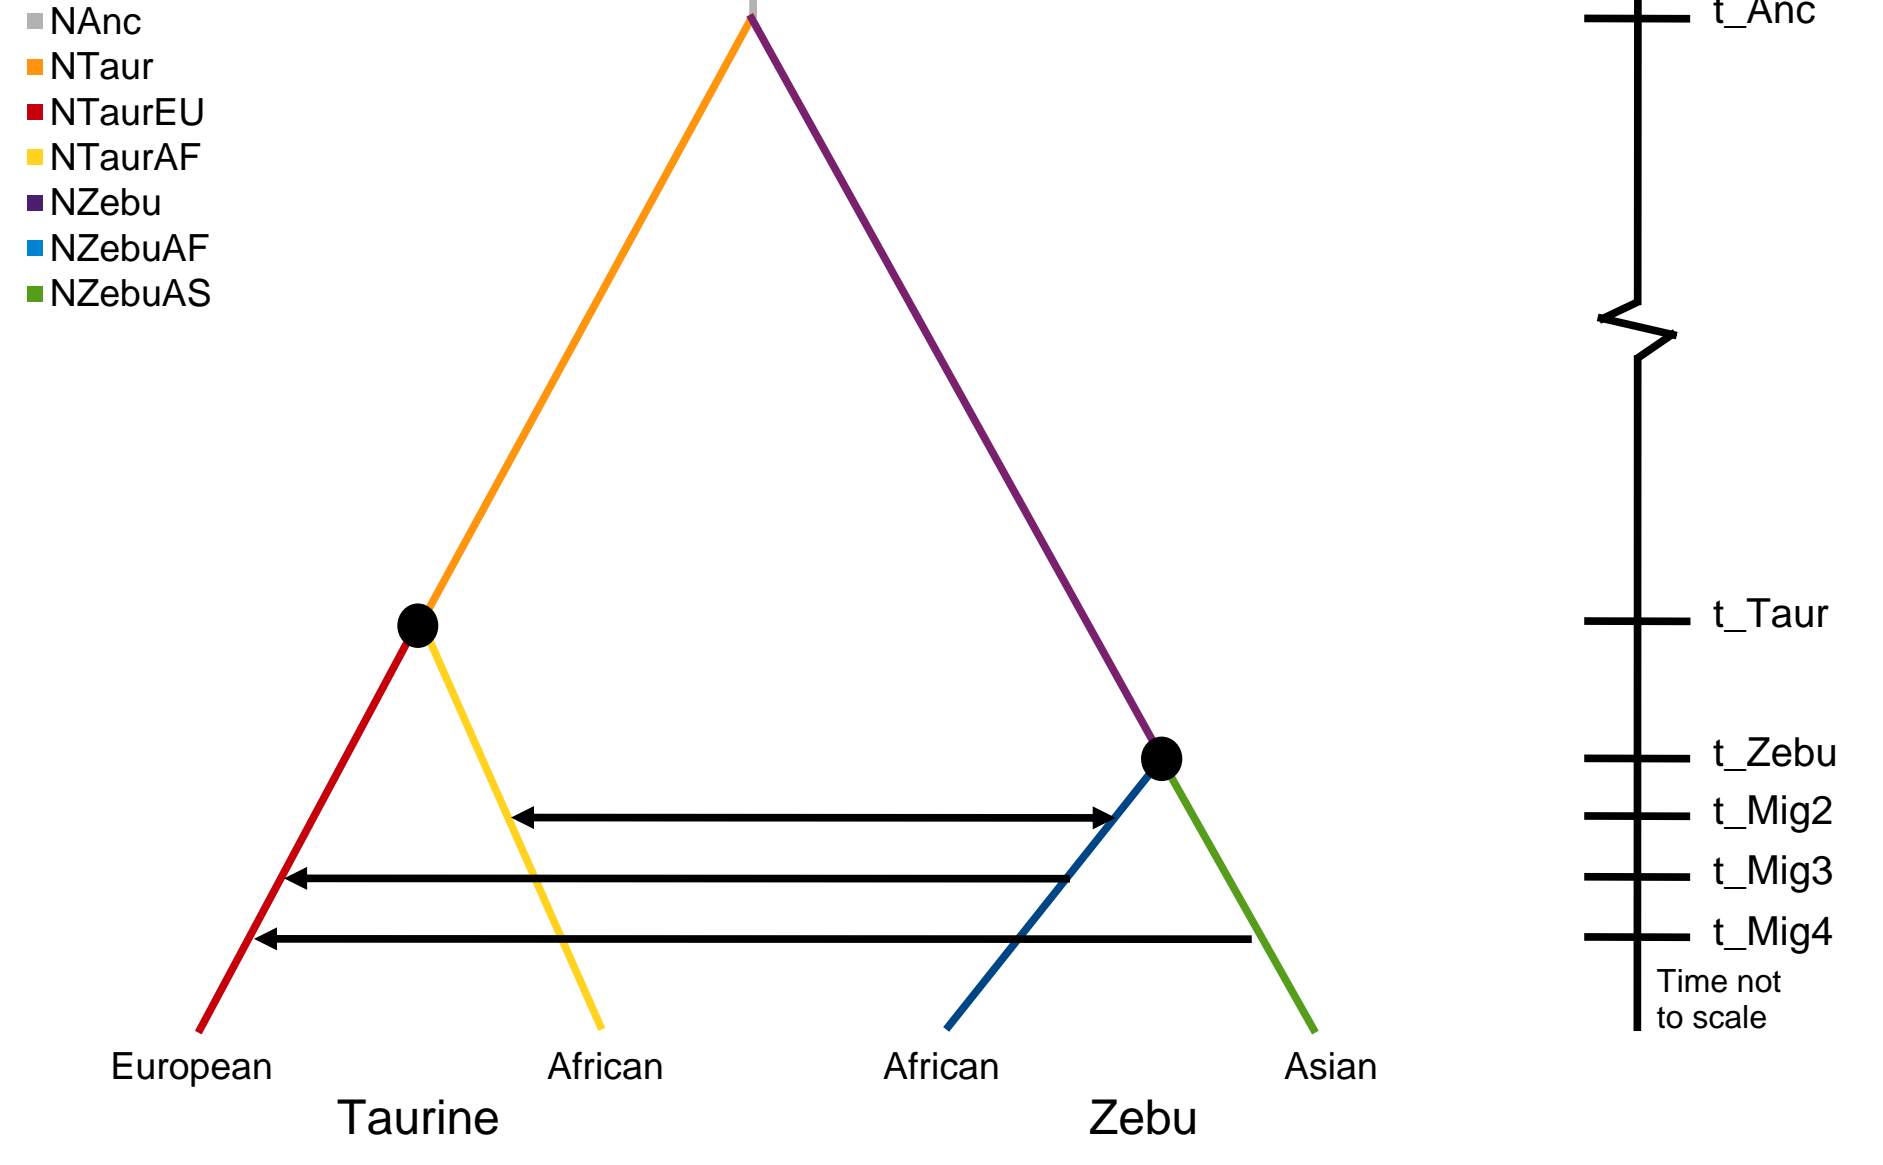

Scenario 13.

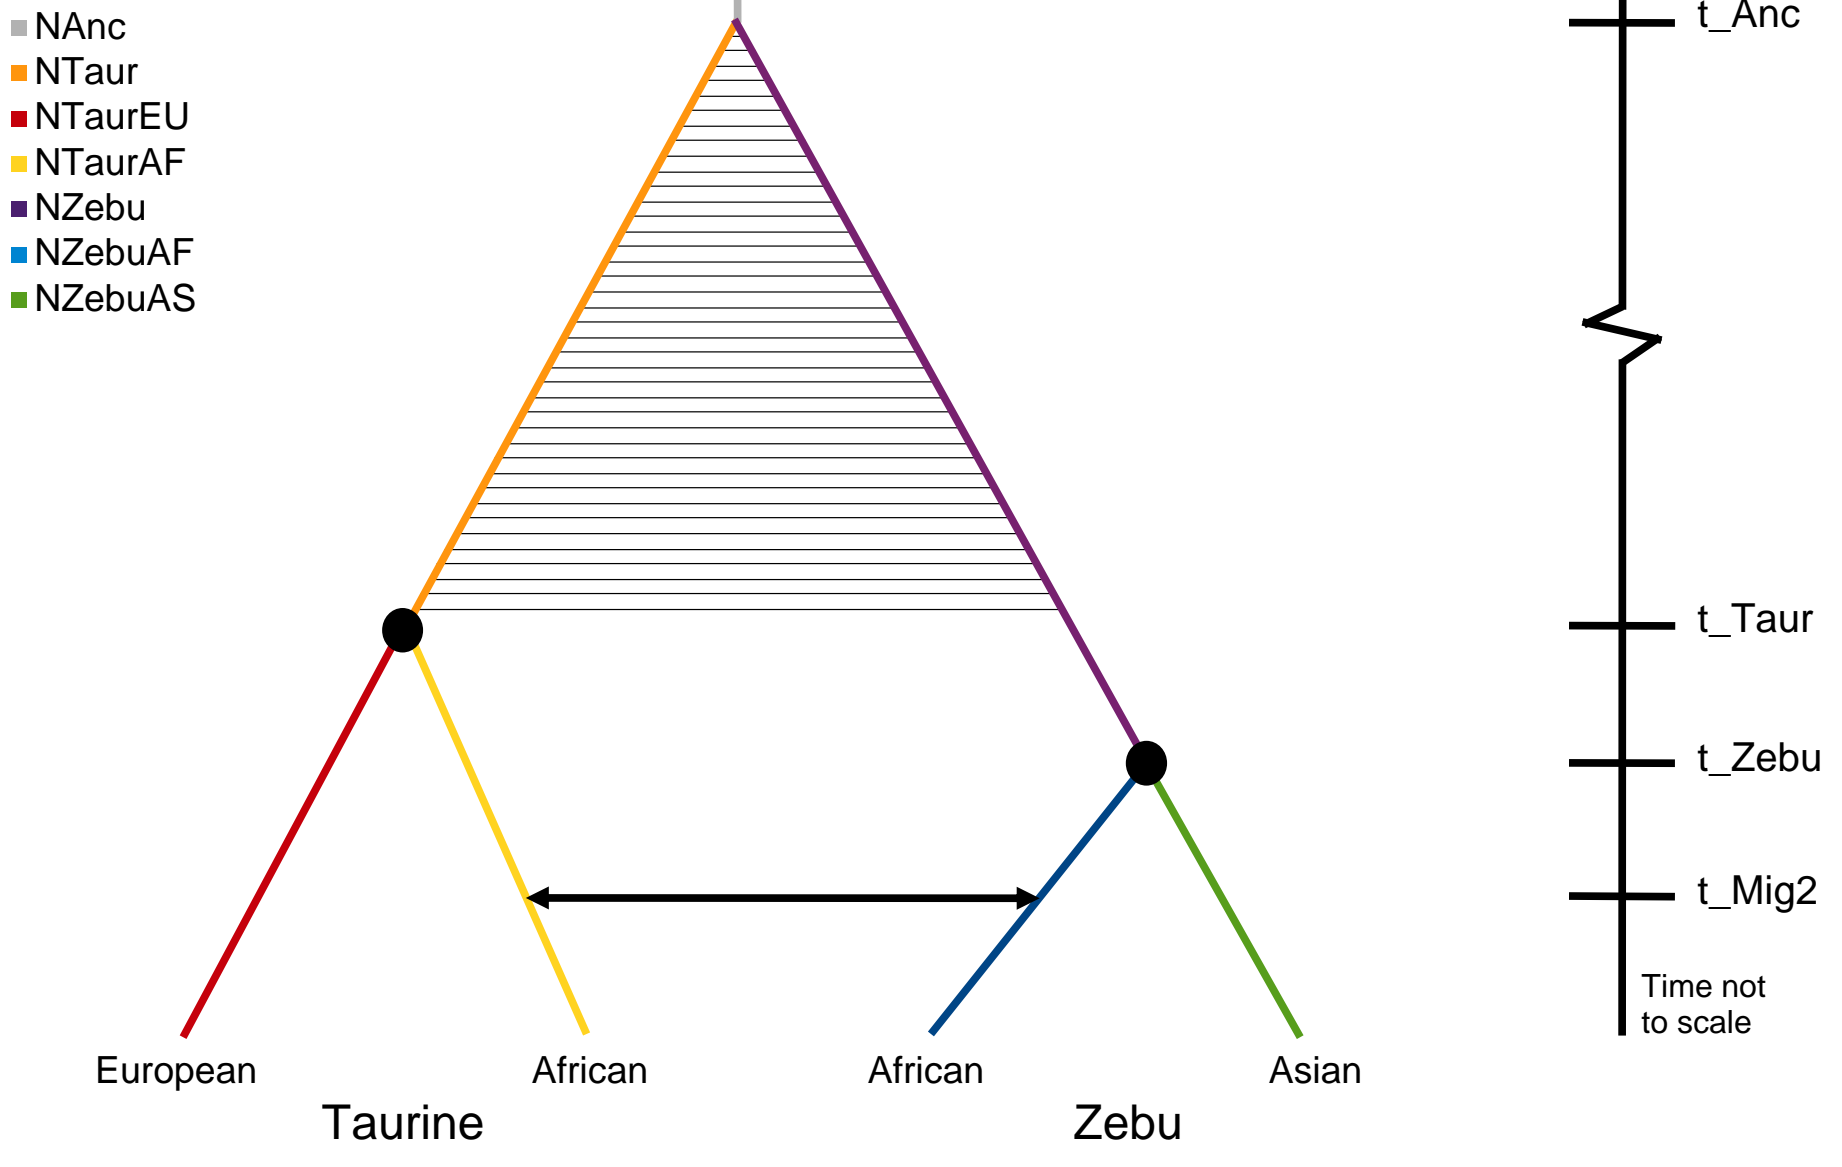

Scenario 15.

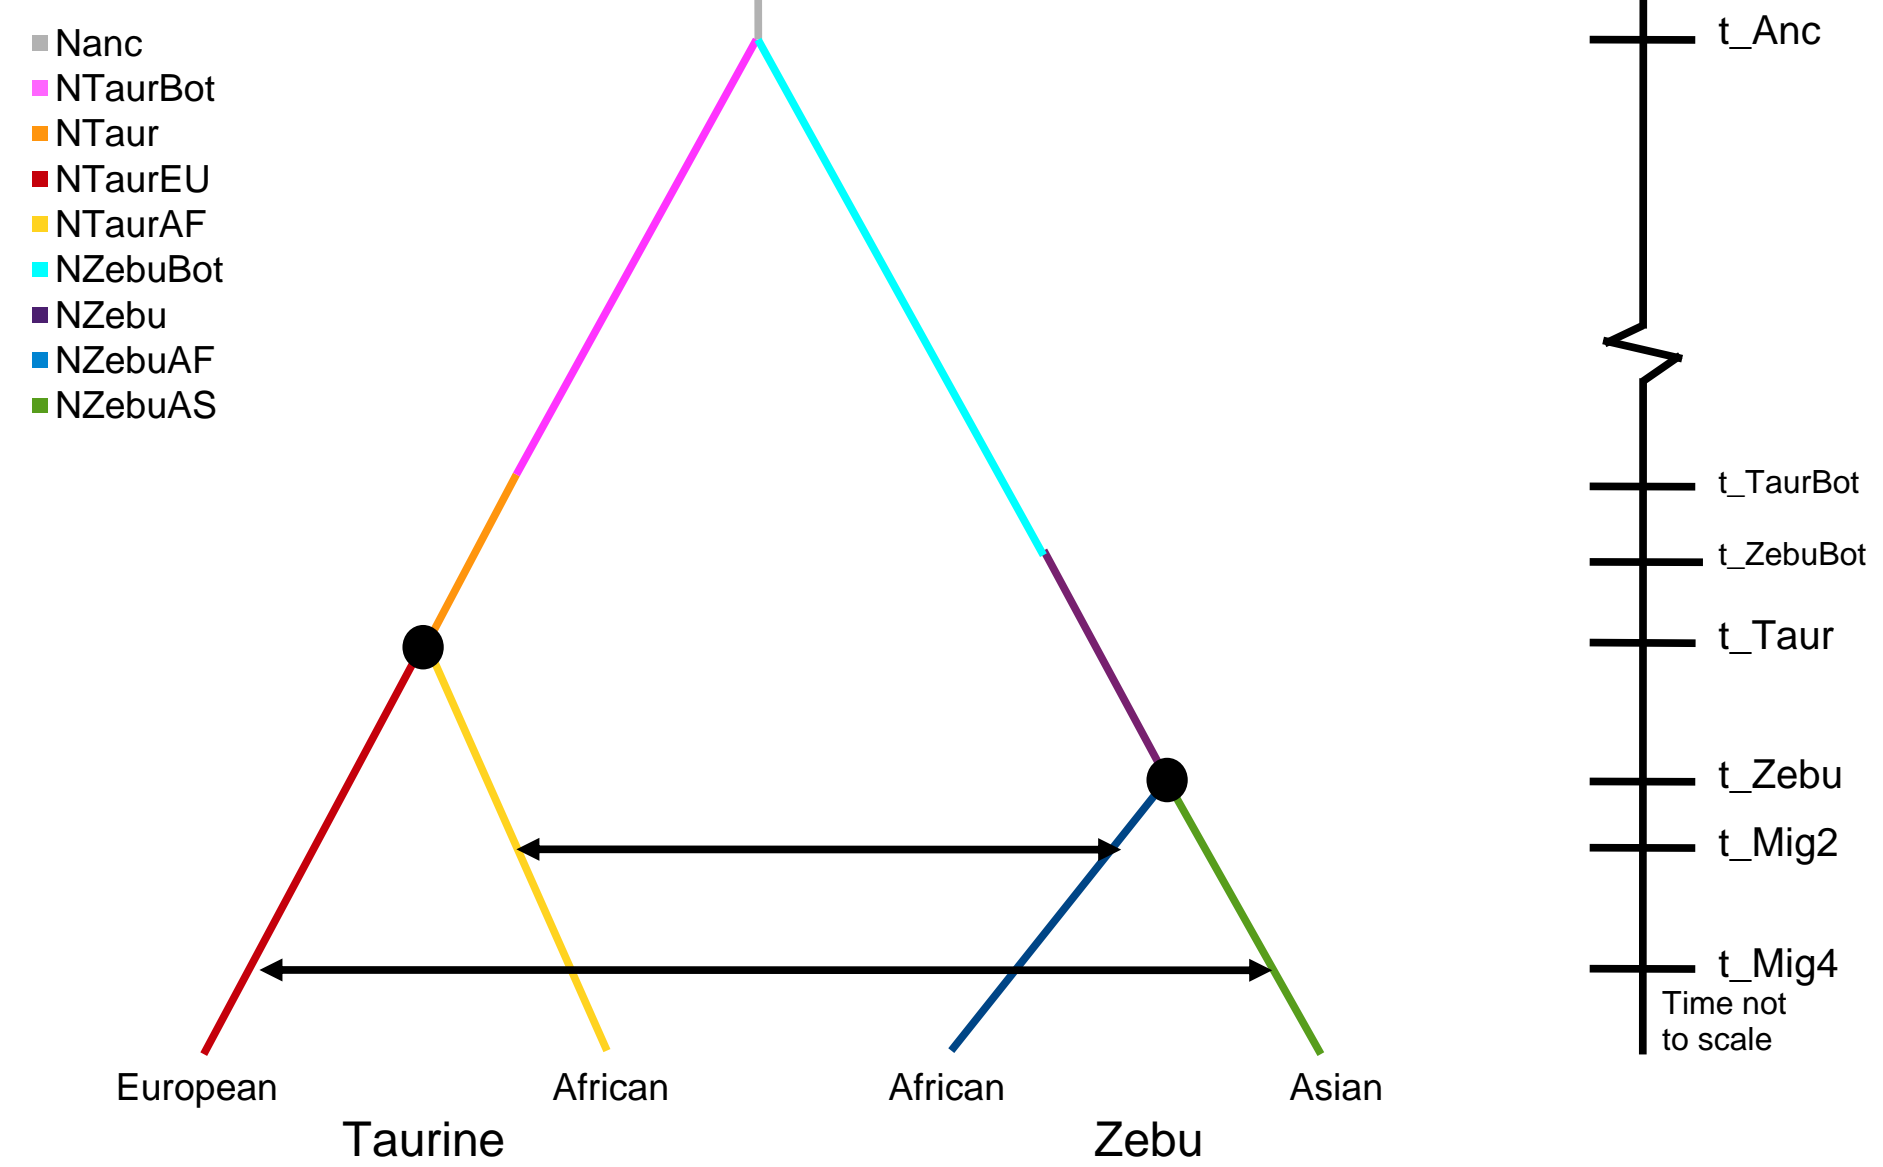

Supplement: EVA-12-123-s001.pdf [file EVA-12-123-s001.pdf]
