# Supplementary material for: Domestication of cattle: Two or three events?
Source: PubMed Central journal article supplement (PMC6304694; doi:10.1111/eva.12674), 2018-07-23

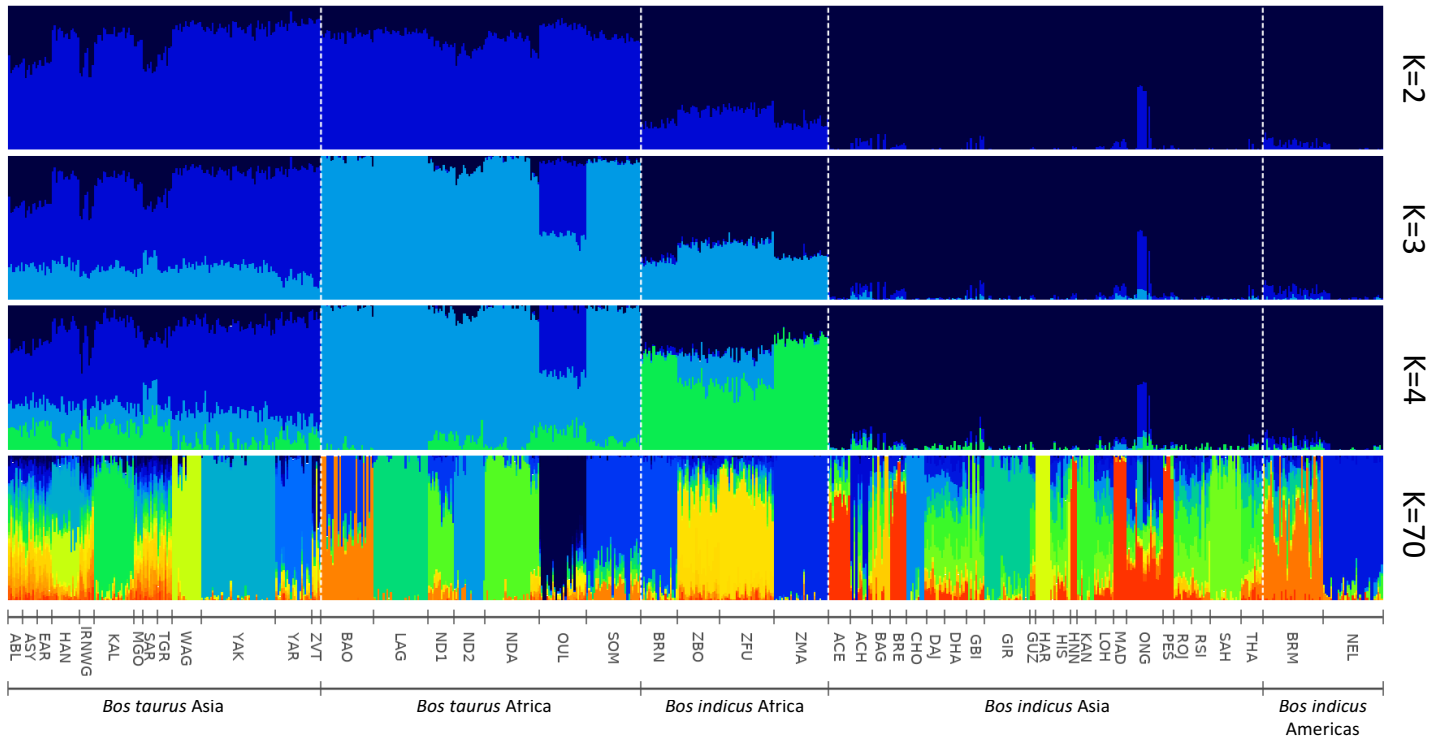

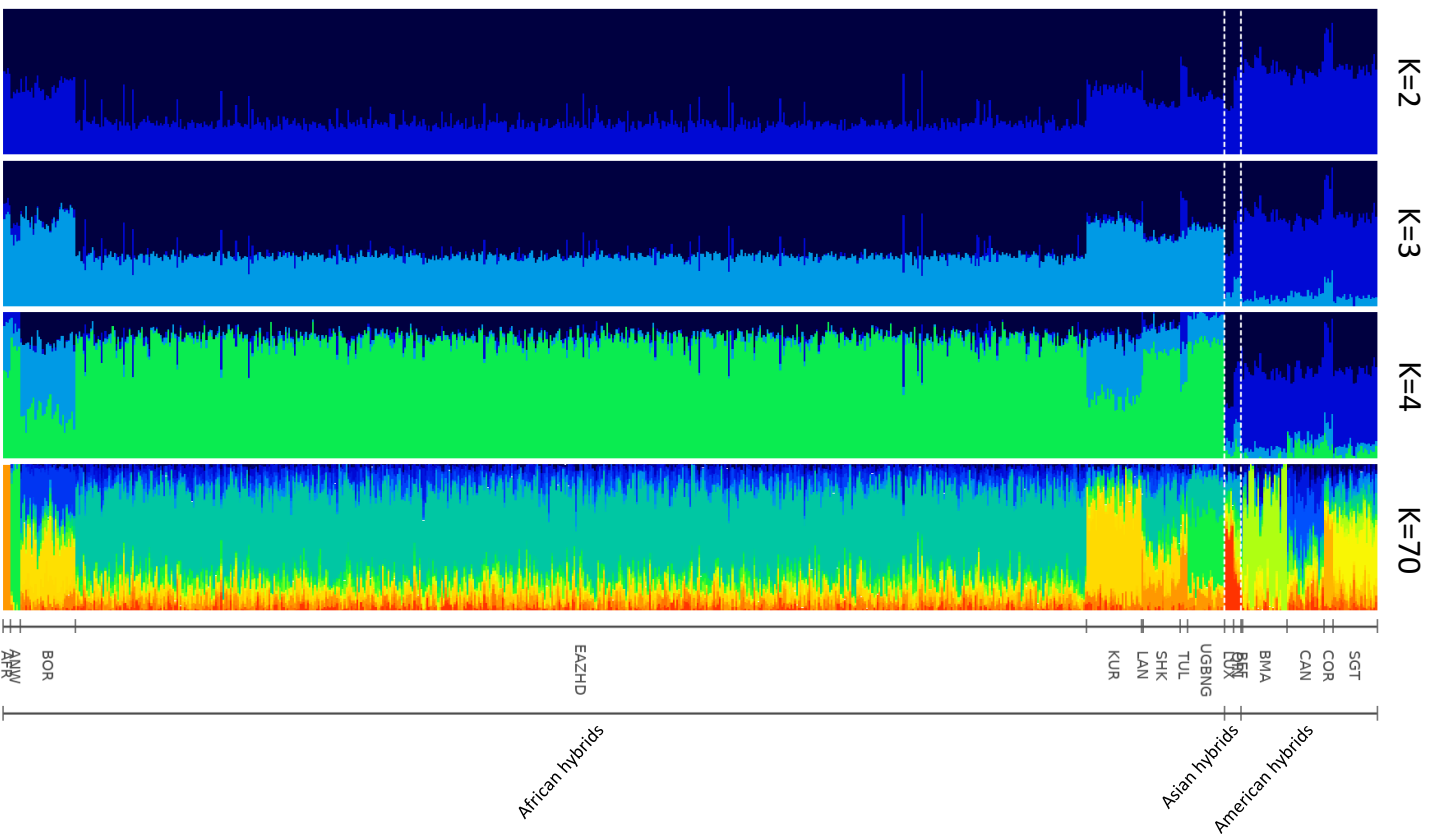

Supplement: EVA-12-123-s003.pdf [file EVA-12-123-s003.pdf]
